1 **Chronic obstructive pulmonary disease and cigarette smoke exposure lead to dysregulated**  
2 **MAIT cell activation by bronchial epithelial cells**

3

4 Megan E. Huber<sup>1</sup>, Emily Larson<sup>2</sup>, Taylor N. Lust<sup>3</sup>, Chelsea M. Heisler<sup>3</sup>, Melanie J. Harriff<sup>1,3,4</sup>

5

6 <sup>1</sup>Department of Molecular and Microbial Immunology, Oregon Health & Science University,  
7 Portland, Oregon USA

8 <sup>2</sup>Portland VA Research Foundation, Portland, Oregon USA

9 <sup>3</sup>Division of Pulmonary, Allergy and Critical Care Medicine, Oregon Health & Science  
10 University, Portland, Oregon USA

11 <sup>4</sup>VA Portland Health Care System, Portland, Oregon USA

12

13 **Abstract**

14

15 Chronic obstructive pulmonary disease (COPD) is associated with airway inflammation,  
16 increased infiltration by CD8<sup>+</sup> T lymphocytes, and infection-driven exacerbations. COPD is most  
17 commonly caused by cigarette smoke (CS), however the mechanisms driving development of  
18 COPD in some smokers but not others are incompletely understood. Lung-resident mucosal-  
19 associated invariant T (MAIT) cells play a role in both microbial infections and inflammatory  
20 diseases. MAIT cell frequency is reduced in the peripheral blood of individuals with COPD,  
21 however the role of MAIT cells in COPD pathology is unknown. Here, we examined MAIT cell  
22 activation in response to CS-exposed primary human bronchial epithelial cells (BEC) from  
23 healthy, COPD, or smoker donors. We observed significantly higher MAIT cell responses to  
24 COPD BEC than healthy BEC. However, COPD BEC stimulated a smaller fold-increase in  
25 MAIT cell response despite increased microbial infection. For all donor groups, CS-exposed  
26 BEC elicited reduced MAIT cell responses; conversely, CS exposure increased ligand-mediated  
27 MR1 surface translocation in healthy and COPD BEC. Our data demonstrate MAIT cell  
28 activation is dysregulated in the context of CS and COPD. MAIT cells could contribute to CS-  
29 and COPD-associated inflammation through both inappropriate activation and reduced early  
30 recognition of bacterial infection, contributing to microbial persistence and COPD exacerbations.

31

## 32 **Introduction**

33

34 Despite continued smoking cessation programs, smoking remains a major health concern, with  
35 eight million deaths in 2017 attributed to tobacco usage<sup>1</sup>. Cigarette smoking is associated with a  
36 variety of immunological impacts, including significantly higher susceptibility to microbial  
37 infections<sup>2-4</sup>. The components of cigarette smoke act as both pro-inflammatory and  
38 immunosuppressive factors that modulate innate and adaptive immunity<sup>3</sup>. For example, cigarette  
39 smoke activates caspase 1 to secrete IL-1 $\beta$  and IL-18 *in-vivo*<sup>5-7</sup>, resulting in emphysema and  
40 small airway remodeling<sup>8,9</sup> and accumulation of CD4<sup>+</sup> and CD8<sup>+</sup> T cells through IFN- $\gamma$   
41 signaling<sup>9</sup>. In the context of infection, cigarette smoke inhibits production of pro-inflammatory  
42 cytokines in response to microbial infection or LPS stimulation<sup>10</sup>, increases adhesion of  
43 *Streptococcus pneumoniae* to bronchial epithelial cells<sup>11</sup>, and delays clearance of *P.*  
44 *aeruginosa*<sup>12</sup>. Conversely, others have observed that repeated cigarette smoke exposure in mice  
45 with persistent *S. pneumoniae* airway infection resulted in increased release of pro-inflammatory  
46 cytokines including IL-12 and IL-1 $\beta$ , greater bacterial load, and reduced lung function<sup>13</sup>,  
47 suggesting that the interplay between cigarette smoke, the airway, and microbial infections is  
48 complex.

49

50 Cigarette smoking also results in long-term airway changes, evidenced by its role as the primary  
51 risk factor for the development of chronic obstructive pulmonary disease (COPD)<sup>14,15</sup>, which  
52 itself is the third leading cause of death worldwide<sup>16</sup>. COPD is manifested in a number of clinical  
53 phenotypes including small airway disease (e.g. bronchitis) and emphysema, all of which are  
54 characterized by chronic inflammation and airflow limitation in the lung and airway<sup>14</sup>. Further  
55 complicating COPD pathology are exacerbations, triggered by bacterial or viral colonization and  
56 infection, which can increase inflammation and play an important role in the morbidity and  
57 mortality associated with COPD<sup>14,15</sup>.

58

59 The immune mechanisms underlying the development of airway damage and inflammation  
60 leading to COPD in some smokers but not others are poorly defined. Central to this, our  
61 understanding of the complex interactions between many cell types is incomplete<sup>17</sup>. CD8<sup>+</sup> T  
62 cells, which are often increased in the lungs of patients with bacterial infections, are the main

63 subset of inflammatory cell increased in the lungs of smokers with COPD compared to  
64 asymptomatic smokers<sup>18</sup>. Increased frequencies of CD8<sup>+</sup> T cells were also observed at the onset  
65 of acute exacerbations<sup>19</sup>. Interestingly, chronic cigarette smoke exposure alone resulted in  
66 persistent clonal expansion of CD8<sup>+</sup> T cells in mice<sup>20</sup>. In human COPD lung tissue, CD8<sup>+</sup> T  
67 lymphocytes have increased expression of chemokine receptors, cytotoxic effector molecules,  
68 and pro-inflammatory cytokines (reviewed in <sup>19</sup>). Despite mounting evidence that CD8<sup>+</sup> T cells  
69 are specifically correlated with COPD pathology, the mechanisms underlying the role of CD8<sup>+</sup> T  
70 cells in cigarette smoke- and COPD-mediated pathology remain unclear. Mucosal-associated  
71 invariant T (MAIT) cells are an innate-like subset of T lymphocytes that make up a relatively  
72 large proportion of the total CD8<sup>+</sup> T cell population in the blood and lungs in healthy  
73 individuals<sup>21</sup>. Interestingly, despite the overall increase in CD8<sup>+</sup> T cells in COPD, the frequency  
74 of both peripheral blood and lung-resident MAIT cells in individuals with COPD is decreased<sup>22-</sup>  
75 <sup>25</sup>. This observation is different from many other infectious and inflammatory lung conditions,  
76 and the mechanisms underlying MAIT cell loss in COPD lungs are not yet defined. In fact, little  
77 is known about the role of MAIT cells in cigarette smoke- and COPD-associated inflammatory  
78 processes.

79  
80 The antigens presented to MAIT cells by the MHC class I related molecule, MR1, are primarily  
81 small molecule metabolites generated during riboflavin biosynthesis by many microbial  
82 organisms<sup>26-28</sup>, including those implicated in COPD-associated exacerbations<sup>22,29,30</sup>. MAIT cells  
83 can also be activated through both antigen-independent, cytokine-mediated mechanisms<sup>31</sup>. IL-12  
84 and IL-18, the cytokines that elicit this type of antigen-independent response, are among those  
85 produced by airway epithelial cells and other inflammatory cells in the context of cigarette  
86 smoke and COPD<sup>5,7,32</sup>. The direct impact of cigarette smoking and COPD on MR1 antigen  
87 presentation and subsequent MAIT cell responses to infected airway cells is unknown, however.  
88 We hypothesized that exposure of bronchial epithelial cells (BEC) to cigarette smoke and the  
89 inflammatory COPD airway environment would result in dysregulated MAIT cell responses  
90 through altered MR1 function, contributing to inflammation and exacerbation. We found that  
91 exposure of BEC to cigarette smoke decreased both microbe-independent and microbe-  
92 dependent responses. Furthermore, BEC from COPD lungs induced greater MAIT cell responses  
93 compared to healthy controls. Exposure to cigarette smoke did not affect transcriptional

94 expression of *MR1*, but did result in increased MR1 surface expression, suggesting that smoking  
95 may interfere with the ability of MR1 to encounter microbial ligands. Our data demonstrate that  
96 impaired interactions between airway epithelial cells and MAIT cells, resulting in dysregulated  
97 release of pro-inflammatory cytokines and other molecules, may play a role in COPD-associated  
98 inflammation in the context of both cigarette smoke as well as bacterial colonization and  
99 infection.

100

## 101 **Results**

102

### 103 **BEC from COPD lungs induce increased microbe-independent, MR1-dependent activation** 104 **of MAIT cells.**

105

106 Inappropriate MR1 antigen presentation and activation of lung-resident MAIT cells could  
107 contribute to the inflammatory airway environment present in COPD airways and following  
108 cigarette smoking. As such, we tested the ability of MAIT cells to respond to primary human  
109 BEC from the lungs of COPD or smoker donors compared to healthy controls, and in the context  
110 of cigarette smoke exposure. BEC were isolated from the lungs of healthy (N=7), COPD (N=6),  
111 or smoker (N=6) donors between the ages of 41 and 73 (Table 1). BEC from these donors were  
112 incubated with a previously described MAIT cell clone (D426 G11)<sup>33,34</sup> following treatment with  
113 cigarette smoke extract (CSE) and infection with *Mycobacterium smegmatis* or *Streptococcus*  
114 *pneumoniae* in an ELISPOT assay with IFN- $\gamma$  production by the MAIT cell clone as the readout.  
115 A linear mixed effects model with square root transformation of the IFN- $\gamma$  spot forming units  
116 (SFU) was used to analyze the data for significant effects of donor BEC groups on MAIT cell  
117 responses.

118

119 We first analyzed the response of the MAIT cell clone to uninfected BEC. We observed  
120 significantly greater microbe-independent IFN- $\gamma$  SFU in response to BEC from COPD donors  
121 than healthy or smoker donors ( $p=0.0416$ , Figure 1a, Table 2). These microbe-independent  
122 MAIT cell responses to COPD donors were greater than responses observed to the uninfected  
123 bronchial epithelial cell line (BEAS-2B) control (Figure S1). There were no differences in the  
124 MAIT cell response to smoker donors compared to healthy controls ( $p=0.5173$ , Figure 1a, Table

125 2). We hypothesized that an increase in pro-inflammatory cytokines capable of mediating MAIT  
126 cell responses such as IL-18<sup>31</sup>, which is produced by primary BEC from the lungs of subjects  
127 with COPD<sup>5,6,32</sup>, could induce increased MR1-independent MAIT cell responses absent  
128 microbial antigens. To determine whether stimulation of IFN- $\gamma$  production by the MAIT cells  
129 occurred through MR1- or cytokine-dependent pathways, we used antibodies to block MR1 or  
130 IL-12 and IL-18 in BEC from a representative healthy and COPD donor. There was almost  
131 complete blockade of the IFN- $\gamma$  SFU response for both the healthy and COPD donors in the  
132 presence of the 26.5  $\alpha$ -MR1 antibody, with very little impact of blocking IL-12 and IL-18  
133 (Figure 1b-c). This suggests that despite the lack of antigen from microbial infection, there are  
134 nonetheless MR1-dependent MAIT cell responses to primary BEC from all donors. Further,  
135 these MR1-dependent responses are increased in the context of cells from COPD lungs.

136

137 We did observe diffuse IFN- $\gamma$  staining haze in all ELISPOT wells containing both BEC and  
138 MAIT cells (Figure 1c). This haze was completely abrogated in the context of IL-12 and IL-18  
139 blocking for both donors, demonstrating that there are likely cytokine-mediated MAIT cell  
140 responses to the primary BEC in addition to the MR1-dependent responses. Quantification of  
141 non-spot forming IFN- $\gamma$  is not possible in the context of an ELISPOT assay. Therefore, we were  
142 unable to determine whether there was also a meaningful difference in this cytokine-dependent  
143 response to the healthy or COPD donor BEC. We did, however, perform an assay to detect IL-18  
144 secretion by a representative healthy, COPD, and smoker donor. All donors produced less than  
145 2pg/mL of IL-18, with no difference between the donors (Figure S2). Taken together with the  
146 abrogation of IFN- $\gamma$  spots in the presence of the  $\alpha$ -MR1 antibody, our data suggest that microbe-  
147 independent MAIT cell activation is largely mediated through MR1-dependent mechanisms and  
148 is increased in response to COPD BEC.

149

150 **BEC from COPD lungs induce a decreased fold-change in microbe-dependent, MR1-**  
151 **dependent activation of MAIT cells.**

152

153 We next looked at MAIT cell responses to BEC from these same donors infected with the  
154 pneumonia-causing pathogen *S. pneumoniae* (*Sp*), or with *M. smegmatis* (*Msm*) as a positive  
155 control. As expected, the linear mixed effects modeling showed that MAIT cell responses to the

156 *Sp*- or *Msm*-infected healthy donor BEC were significantly greater than responses to uninfected  
157 BEC ( $p < 0.0001$ , Figure 2a, Table 3). Similar to the microbe-independent ELISPOT assays, the  
158 MAIT cell IFN- $\gamma$  SFU responses to infected BEC required MR1, as demonstrated by nearly  
159 complete blocking in the presence of the 26.5  $\alpha$ -MR1 antibody (Figure 2b). Overall, *Msm*- or *Sp*-  
160 infected BEC from COPD donors induced higher, but not statistically significant, MAIT cell  
161 responses than infected BEC from healthy or smoker donors (Figure 2a, Table 2). To further  
162 explore this observation, we enumerated microbial infection of BEC from healthy, COPD or  
163 smoker donors using fluorescence microscopy. We observed significantly more *Sp* cocci  
164 associated with BEC from COPD lungs compared to BEC from healthy or smoker lungs  
165 ( $p < 0.0001$ , Figure 3a-b).

166  
167 To quantify the infection-mediated increase in MAIT cell IFN- $\gamma$  production and take into  
168 account the differences in antigen-independent activation of MAIT cells between the BEC donor  
169 groups, we compared the pairwise fold change in IFN- $\gamma$  SFU responses between uninfected and  
170 infected donor BEC (Figure 3c). Surprisingly, the infection-mediated increase in MAIT cell  
171 responses to infected COPD donor BEC was reduced in comparison to fold-change responses to  
172 healthy and smoker donor BEC. Therefore, despite significantly greater bacterial infection per  
173 cell and overall higher induction of MAIT cell IFN- $\gamma$  production, COPD donor BEC stimulated a  
174 weaker MAIT cell response upon infection. These results suggest that MR1 antigen presentation  
175 is impaired in infected BEC from COPD lungs.

176  
177 **Exposure to cigarette smoke decreases MAIT cell activation in response to primary BEC**  
178 **from healthy, COPD, and smoker lungs.**

179  
180 We next examined whether treating primary BEC with cigarette smoke impacts microbe-  
181 independent MAIT cell responses. BEC were treated with 30% cigarette smoke extract (CSE)  
182 prior to infection and subsequent incubation with MAIT cell clones in an IFN- $\gamma$  ELISPOT assay.  
183 For healthy and COPD donor BEC, CSE treatment did not significantly affect overall MAIT cell  
184 IFN- $\gamma$  responses (Figure 4a, Table 3). Interestingly, when comparing the fold change in IFN- $\gamma$   
185 SFU, BEC from COPD and smoker donors induced significantly lower MAIT cell responses  
186 after incubation with CSE (Figure 4b, Table 2). In other words, the magnitude of the CSE-

187 mediated decrease in MAIT cell response was significantly greater for COPD and smoker BEC  
188 than healthy donors.

189

190 We next explored the impact of CSE treatment in combination with bacterial infection. Notably,  
191 MAIT cell responses to infected BEC from all donor groups were significantly reduced by CSE  
192 treatment (Figure 5a-b, Table 2-3). The decreased response with CSE treatment was unexpected,  
193 given previous reports indicating that cigarette smoke treatment increases *Sp* infection of  
194 respiratory tract epithelial cells<sup>35-37</sup>. As such, we examined the efficiency of *Sp* infection in these  
195 cells as described above. CSE treatment increased the number of *Sp* cocci per BEC from healthy  
196 (p<0.001) and COPD donor groups (p=0.029, Figure 5d-e). In the context of this increased  
197 infection, our observation of decreased IFN- $\gamma$  SFU response to CSE-treated cells suggested  
198 cigarette smoke may downregulate MR1 antigen presentation to MAIT cells. The average  
199 number of microbes per BEC was significantly greater for CSE-treated BEC from COPD donors  
200 than from healthy (p=0.034) or smoker donors (p=0.0053, Figure 5d-e). There were no significant  
201 donor group differences in the fold change IFN- $\gamma$  response to CSE-treated, infected BEC (Figure  
202 5c), these results suggesting that the combination of infection and CSE treatment may affect  
203 healthy BEC similarly to COPD BEC. Interestingly, CSE treatment did not significantly affect  
204 *Sp* infection of BEC from smoker donors (Figure 5d-e) despite reduced MAIT cell responses  
205 (Figure 5b), suggesting that cigarette smoke alteration of *Sp* infection and downstream MAIT  
206 cell responses may occur through varied mechanisms that differ in the context of acute versus  
207 chronic smoke exposure. Together, our data suggest a complex role for cigarette smoke in  
208 modulating MR1 antigen presentation to MAIT cells.

209

### 210 **Acute CS exposure does not impact transcriptional regulation of MR1.**

211

212 Our ELISPOT and infection results suggested that MR1-dependent MAIT cell activation was  
213 impacted in cells from the COPD lung environment and following acute treatment with CSE. We  
214 considered the possibility that altered MR1 expression in these cells could explain these changes.  
215 Although MR1 expression has been confirmed in all cell types studied to-date<sup>38</sup>, nearly all  
216 analyses of MR1 expression and regulation have focused on the surface expression of MR1  
217 protein. There are a limited number of studies examining *MR1* gene expression in bulk cells from

218 the lung parenchyma or peripheral blood of COPD donors<sup>24,25</sup>, however we are unaware of any  
219 analysis of the impact of COPD or CS exposure on *MR1* expression in primary BEC. Therefore,  
220 we looked at *MR1* gene expression in BEC from COPD and smoker lungs compared to healthy  
221 controls and sought to determine if exposure to CSE had any impact on *MR1* mRNA expression  
222 in BEC from all donors. We isolated mRNA from BEC following CSE treatment and  
223 corresponding control conditions, and measured expression of *MR1* and the internal control  
224 *HPRT1*. Baseline  $C_t$  values and  $\Delta C_t$  analysis of *MR1* mRNA across all donors revealed  
225 significantly higher expression of *MR1* mRNA in smoker donors compared to healthy controls at  
226 baseline (Figure 6a,  $p=0.0200$ ). The smaller  $\Delta C_t$  value for COPD BEC compared to healthy  
227 donors suggested higher *MR1* expression, however this difference was not significant (Figure  
228 6a). Using the  $2^{-\Delta\Delta C_t}$  method, we then determined the fold increase in *MR1* expression within  
229 each donor in the context of CSE treatment relative to no treatment (Figure 6b). For all BEC  
230 donor groups, paired comparisons demonstrated there were no statistically significant impacts of  
231 acute CSE exposure on *MR1* expression. Although there were no significant impacts of these  
232 treatments alone when examining paired responses for individual donors, ANOVA analysis of  
233 the  $\Delta C_t$  values between the groups as a whole indicated that, similar to the baseline condition,  
234 BEC from smoker donors treated with CSE still expressed significantly greater *MR1* compared  
235 to healthy donors ( $p=0.0319$ , Figure 6b). Taken together, these results do not demonstrate a  
236 consistent role for baseline expression or CSE-mediated transcriptional regulation of *MR1* in the  
237 observed ability of MAIT cells to respond to BEC. While increased *MR1* expression in BEC  
238 from COPD lungs could explain the increase in microbe-independent responses to these cells,  
239 these findings are not consistent in BEC from smoker lungs.

240

#### 241 **Acute cigarette smoke exposure increases MR1 surface translocation in BEC**

242

243 Although the *MR1* mRNA expression was not significantly different, other impacts to  
244 intracellular function in the context of CS or COPD could result in changes to surface *MR1*  
245 protein expression. To examine this possibility, we measured the surface expression of *MR1* on  
246 primary BEC at basal levels and following induction of *MR1* surface translocation through  
247 treatment with the ligand 6-formylpterin (6-FP). Consistent with our previous studies, the level  
248 of endogenous *MR1* surface expression in *ex-vivo* primary BEC is relatively low compared to



249 cell lines<sup>39</sup>, particularly those that overexpress MR1<sup>40</sup>. As such, we included BEAS-2B cells  
250 overexpressing MR1 in each assay as a control to confirm detection and surface translocation of  
251 MR1 (Figure S3a-b). In our primary BEC, despite the expected low MR1 surface expression, we  
252 were nonetheless able to detect 6-FP-mediated increases in surface MR1 in all of our donors  
253 (Figure 6c). In healthy BEC, there was a significant increase in surface MR1 following 6-FP  
254 treatment ( $p=0.0182$ ). Although not significant, we also observed a modest increase for each  
255 COPD and smoker BEC donor treated with 6-FP. We then assessed the role of acute exposure to  
256 CSE in modulating these processes. As with *MR1* mRNA expression, basal expression of surface  
257 MR1 in healthy and COPD cells was not impacted by CSE treatment (Figure 6d). However, the  
258 6-FP-mediated increase in surface MR1 was increased in the context of CSE treatment for  
259 healthy ( $p=0.0051$ ) and COPD donors ( $p=0.0161$ ). Interestingly, we observed no significant  
260 pairwise changes from CSE treatment alone or in combination with 6-FP for smoker donor BEC  
261 (Figure 6d), further indicating that MR1 expression is differentially affected by acute CSE  
262 exposure, long-term cigarette smoking, and intracellular changes induced in BEC during the  
263 development of COPD. Together, our results demonstrate that acute exposure to cigarette smoke  
264 may impact ligand-dependent surface translocation of MR1.

265

## 266 **Discussion**

267

268 MAIT cells are an evolutionarily conserved subset of T cells present in high proportions in  
269 human blood and peripheral mucosal sites. While MAIT cells were first described for their role  
270 in recognizing and responding to microbial infection<sup>33,41</sup>, evidence continues to grow for their  
271 role in inflammatory non-infectious diseases<sup>42</sup>. Furthermore, MAIT cells have now been  
272 implicated in the homeostasis and repair of various mucosal barrier tissues, including the lung<sup>43</sup>.  
273 MAIT cell functions may be relevant both to the cigarette smoke-mediated development of  
274 airway inflammation resulting in COPD pathologies and to airway exacerbations common in  
275 COPD. Of note, numerous groups have observed decreased MAIT cell frequencies in both the  
276 peripheral blood and lungs of individuals with COPD<sup>22,23,25</sup>, which is contrary to the increase in  
277 MAIT cell frequency observed in many inflammatory conditions. It is tempting to speculate that  
278 persistent inflammation and microbial colonization in COPD lungs could result in aberrant  
279 activation of MAIT cells leading to exhaustion and loss, as well as inappropriate recruitment of

280 the adaptive lung immune response. Loss of MAIT cells could subsequently be an important  
281 factor in the inability to reverse tissue pathology observed in COPD lungs, due to the loss of their  
282 function in tissue repair. In this way, MAIT cells could be important early immune contributors  
283 supporting the Goldilocks hypothesis of COPD pathogenesis proposed by Curtis et al., where too  
284 strong or too weak adaptive immune response can lead to worsened symptoms of COPD<sup>17</sup>. Here,  
285 we considered how changes to large airway epithelial cells, the first line of defense against  
286 external assaults important to the development of COPD pathology, including cigarette smoke  
287 and microbial infection, alter MAIT cell activation.

288

289 We found that acute exposure of BEC to CS generally resulted in decreased MAIT cell  
290 responses. This finding was particularly striking in the context of microbially-infected BEC,  
291 where despite significantly increased infection of BEC exposed to cigarette smoke, we observed  
292 significantly decreased MAIT cell response. We and others have repeatedly demonstrated *in*  
293 *vitro* and directly *ex vivo* that increased microbial antigen or infection of healthy, untreated cells  
294 results in increased MAIT cell responses (e.g.<sup>39</sup>). During microbial infection, MAIT cells are  
295 thought to play an important early role in immune response; for example, through the  
296 recruitment of cells like inflammatory monocytes to the site of infection<sup>44,45</sup>. Delayed  
297 recruitment of adaptive immune responses in the lungs of otherwise healthy smokers and in the  
298 context of COPD exacerbations could allow for microbial persistence, inappropriately  
299 amplifying and prolonging lung inflammation.

300

301 We also observed greater microbe-independent MAIT cell responses to BEC than those observed  
302 in response to airway epithelial cell lines. These responses were also significantly higher in  
303 response to BEC from COPD lungs. We initially hypothesized this would be the result of  
304 cytokine-mediated MAIT cell activation due to reports of increased expression of cytokines like  
305 IL-18 in COPD lungs<sup>46-48</sup>. To our surprise, these MAIT cell responses did not require IL-12 and  
306 IL-18, but were in fact dependent on MR1. Therefore, we examined MR1 gene expression. Little  
307 is known about the regulation of MR1 gene expression, although it is known that overexpression  
308 of MR1 increases MR1-dependent MAIT cell responses (e.g. Huber et al.<sup>40</sup>). Additionally,  
309 genome-wide studies have identified *MRI* as a gene with altered expression or methylation status  
310 in the context of e-cigarette smoking<sup>49</sup> and COPD lungs<sup>50</sup>. Although our sample size was not

311 sufficiently powered for statistical significance in this area, our RT-PCR data suggests the  
312 possibility for increased *MRI* expression in BEC from COPD donors. While BEC from smoker  
313 donors did express significantly more *MRI*, we did not observe a corresponding increase in  
314 MAIT cell response. There was also no impact of acute exposure to cigarette smoke on baseline  
315 *MRI* expression in donors from any group, complicating the argument for a role of altered  
316 transcriptional regulation of *MRI* in dysregulated induction of MAIT cell IFN- $\gamma$  production by  
317 uninfected BEC.

318

319 We considered other possible explanations for the increased microbe-independent, MR1-  
320 dependent responses observed in BEC from COPD lungs. One group has posited the possibility  
321 that long-term tissue damage caused by cigarette smoke could lead to the production of T cell  
322 neoantigens that contribute a potential autoimmune component to COPD-associated  
323 inflammation<sup>51</sup>. There has not yet been an endogenous MR1 ligand identified, however,  
324 increasing evidence from cancer MAIT cell biology suggests the existence of self ligands that  
325 can be modified in disease states<sup>52</sup>. Because neoantigens are already known to be important MR1  
326 ligands<sup>53</sup>, the role of potential novel MR1 neoantigens produced in the context of damage from  
327 long-term cigarette smoke and COPD inflammation should be an avenue of interest. Given the  
328 small molecule nature of MR1 ligands, we initially hypothesized that cigarette smoke itself could  
329 contain novel ligands. However, absent other antigens, we did not observe any significant  
330 increase in MR1 expression of CSE-treated BECs. Furthermore, our functional data demonstrate  
331 that, if CS did contain MR1 ligands, they would not be MAIT-TCR stimulatory. If anything,  
332 exposure to cigarette smoke decreased the microbe-dependent MAIT cell responses, suggesting  
333 that any putative ligands in cigarette smoke would be antagonistic. Alternately, acute exposure to  
334 cigarette smoke resulted in an increase in 6-FP-mediated MR1 surface translocation. This  
335 increase could be mediated by CS through altered MR1 trafficking influencing ligand availability  
336 or access to putative chaperones for MR1. Together, these results demonstrate that short-term  
337 and long-term exposure to cigarette smoke could distinctly influence MR1 antigen presentation  
338 leading to dysregulated MAIT cell responses.

339

340 The mechanisms underlying COPD onset in some chronic smokers, but not others, remain  
341 unclear<sup>17,54</sup>. Dysfunctional MAIT cell activation could play a role in early development of

342 COPD-associated inflammation. Absent microbial stimulus, the greater overall MAIT cell  
343 response to COPD BEC suggests that hyper-active MAIT cells could facilitate inappropriate  
344 airway inflammation, possibly through the recruitment of inflammatory monocytes and  
345 neutrophils. Conversely, the hypoactivation of MAIT cells in response to infected and  
346 CS-exposed COPD BEC could permit microbial colonization and promote chronic stimulation of  
347 innate inflammation. In the broader pulmonary context, altered immune signaling from diverse  
348 innate and adaptive cell populations (such as alveolar macrophages and neutrophils) may  
349 contribute to MAIT cell dysregulation. Our study was limited to exploring MR1 antigen  
350 presentation by primary BEC to a healthy MAIT cell clone. Future exploration of inflammatory  
351 signaling between primary MAIT and other immune cells from COPD and smoker donors may  
352 reveal further insight into COPD development. In conclusion, we demonstrate that  
353 MR1-dependent MAIT cell responses to BEC are altered in the context of COPD and cigarette  
354 smoke exposure. Understanding these impacts on MAIT cell activation may inform future  
355 therapies to treat these critically important pulmonary diseases.

356

357

## 358 **Materials and Methods**

359

### 360 **Human subjects**

361 This study was conducted according to the principles expressed in the Declaration of Helsinki.  
362 Study participants, protocols and consent forms were approved by Oregon Health & Science  
363 University Institutional Review Board (IRB00000186). Written and informed consent was  
364 obtained from all donors. Human participants are not directly involved in the study. Healthy  
365 adults were recruited from among employees at Oregon Health & Science University as  
366 previously described to obtain human serum<sup>55</sup>.

367

### 368 **Cells and Reagents**

369 Primary cells were purchased commercially from Lonza Bioscience or collected from lung tissue  
370 obtained from the Pacific Northwest Transplant Bank as previously described in <sup>56</sup>. Primary BEC  
371 from healthy, COPD or smoker human donors (Table 1) were grown using Bronchial Epithelial  
372 Growth Media (CC-3170) and harvested using ReagentPack Subculture reagents (CC-5034)

373 (Lonza). BEAS-2B bronchial epithelial cells were obtained from the American Type Culture  
374 Collection (ATCC CRL-9609) and cultured in DMEM media (Gibco) supplemented with L-  
375 glutamine (25030164, Life Technologies) and 10% heat-inactivated fetal bovine serum. BEAS-  
376 2B:doxMR1-GFP cells stably expressing an MR1-GFP construct under a doxycycline-inducible  
377 promoter<sup>39,57</sup> were cultured similarly to the wildtype, with doxycycline addition 16 hours prior to  
378 harvesting for analysis. The MR1-restricted T cell clone D426G11 was generated and expanded  
379 in RPMI media (Gibco) supplemented with L-glutamine and 10% heat-inactivated human serum  
380 (“RPMI-HuS”) as previously described<sup>33,55</sup>.

381

382 *Streptococcus pneumoniae*<sup>29</sup> was cultured on tryptic soy agar plates with 5% sheep’s blood for  
383 15 hours. Colonies were transferred to brain heart infusion broth and cultured to OD600 between  
384 0.55-0.65 before supplementation with 20% glycerol and storage at -80°C. *Mycobacterium*  
385 *smegmatis* Mc<sup>2</sup>155 (ATCC) was grown in 7H9 broth to late log phase, before supplementation  
386 with 20% glycerol and storage at -80°C. The following antibodies were used: for ELISPOT  
387 assays:  $\alpha$ -MR1 (26.5, Biolegend),  $\alpha$ -IL-12p70 (MAB219100, R&D systems),  $\alpha$ -IL-18 (D044-3,  
388 MBL International Corporation),  $\alpha$ -IgG2A isotype (400224, Biolegend),  $\alpha$ -human IFN- $\gamma$  (7-B6-  
389 1, MabTech); for fluorescence microscopy:  $\alpha$ -human HLA-A,B,C (W6/32, biotinylated,  
390 Biolegend), streptavidin-AlexaFluor-647 (Life Technologies); for flow cytometry:  $\alpha$ -MR1 (26.5,  
391 conjugated to APC, Biolegend),  $\alpha$ -human HLA-A,B,C (W6/32, conjugated to APC, Biolegend).  
392 Phytohemagglutinin PHA-L (L4144 Sigma) was suspended in RPMI-HuS. NucBlue Cell Stain  
393 ReadyProbes (ThermoFisher) and the succinimidyl ester of AlexaFluor 488 (ThermoFisher) were  
394 used per manufacturer’s protocol for microscopy. Doxycycline (Sigma) was suspended in sterile  
395 water and used at 2  $\mu$ g/ml. 6-formylpterin (6-FP, Schirck’s Laboratories) was suspended in  
396 0.01 M NaOH and used at a final concentration of 100  $\mu$ M.

397

### 398 **Cigarette Smoke Extract preparation**

399 Cigarette smoke extract (CSE) was prepared as in <sup>58</sup> using research grade cigarettes (1R6F,  
400 University of Kentucky Tobacco and Health Research Foundation). Briefly, smoke is collected  
401 into a polypropylene 60 ml syringe at a rate of 1 puff per minute for a total of 10 puffs per  
402 individual cigarette. Each puff consists of drawing 35 ml of smoke over 2-second duration, then  
403 slowly infusing the gas into 25 ml RPMI media over 60 seconds. CSE (pH = 7.4) or control

404 RPMI are then sterile filtered and stored at  $-20^{\circ}\text{C}$ . Freshly-thawed aliquots of RPMI (“0% CSE”)  
405 or CSE (“30% CSE”) are diluted to 30% v/v final concentration in culture medium.

406

#### 407 **ELISPOT assay**

408 IFN- $\gamma$  ELISPOT assays were performed as previously described<sup>59</sup> with following modifications:  
409 Primary BEC or BEAS-2B cells ( $1 \times 10^5$  cells/well) were used as antigen presenting cells. BEAS-2B  
410 cells were used from frozen stocks to serve as internal controls. For antibody blocking  
411 experiments, plated cells were incubated with isotype control,  $\alpha$ -MR1, or  $\alpha$ -IL-12 &  $\alpha$ -IL-18  
412 antibodies for 4 hours prior to the addition of antigen. Where indicated, BEC were incubated  
413 with RPMI-HuS containing 0% or 30% CSE for 3 hours before addition of antigen. Cells were  
414 infected with *S. pneumoniae* or *M. smegmatis*, or treated with PHA or control medium for 1 hour  
415 at  $37^{\circ}\text{C}$ . D426G11 MAIT cell clones were added ( $1.5 \times 10^5$  cells/well) before overnight incubation  
416 at  $37^{\circ}\text{C}$ . Following extensive washing with PBS-0.05% Tween 20, plates were incubated with  
417 conjugated  $\alpha$ -human IFN- $\gamma$  antibody for 2 hours before additional washing and colorimetric  
418 development. IFN- $\gamma$  spot-forming units were quantified by AID ELISPOT reader.

419

#### 420 **Fluorescence microscopy**

421 Primary BEC were seeded directly in #1.5 glass bottom chamber slides (Nunc). Upon growth to  
422 60-80% confluency, culture medium was replaced with pre-warmed BEGM containing 0% or  
423 30% CSE and incubated for 3 hours at  $37^{\circ}\text{C}$ . Cells were then infected for 3 hours with  
424 AlexaFluor 488-labeled *S. pneumoniae* as previously described<sup>29</sup> before washing with PBS to  
425 remove unattached bacteria and fixation with 4% paraformaldehyde for 1 hour. Slides were  
426 stained with  $\alpha$ -HLA-A,B,C antibody and NucBlue nuclear stain, then stored at  $4^{\circ}\text{C}$  in Tris-  
427 buffered saline until imaging. Images were acquired using a high-resolution wide-field CoreDV  
428 microscope (Applied Precision) with CoolSNAP ES2 HQ (Nikon) and approximately 20 fields  
429 per condition were selected by unbiased nuclear stain. Images were taken in Z stacks in a  
430  $1024 \times 1024$  format using a  $60 \times$  Plan Apo N objective (NA 1.42) and an iterative algorithm was  
431 used to deconvolve the images using an optical transfer function of 10 iterations (Softworx,  
432 Applied Precision).

433

434 **Real-time quantitative PCR (RT-PCR)**

435 RNA isolation was performed with the RNeasy Plus kit (Qiagen) and cDNA synthesis was  
436 completed with the High Capacity cDNA Reverse Transcription Kit (Life Technologies)  
437 following the manufacturers' protocols. Real-time PCR was performed using Taqman gene  
438 expression assays for *MR1* (Hs01042278\_m1), obtained from Applied Biosystems. Reactions  
439 were run in triplicate. Expression data were normalized to *HPRT1* (Hs02800695\_m1) and  
440 relative expression levels for each target gene were determined using the  $2^{-\Delta\Delta C_t}$  method<sup>60</sup>.

441

442 **Surface MR1 and MHC-Ia flow cytometry**

443 Primary BEC, WT BEAS-2B cells, and BEAS-2B:doxMR1-GFP cells were plated in 6-well  
444 tissue culture plates. Where indicated, cell medium was replaced with pre-warmed medium  
445 containing 0% or 30% CSE for 3 hours at 37°C prior to overnight incubation with 100 uM 6-FP.  
446 After 16 hours incubation, cells were harvested and suspended in FACS buffer containing 2%  
447 heat-inactivated human serum, 2% heat-inactivated goat serum, and 0.5% heat-inactivated FBS  
448 for 30 minutes on ice. Samples were then stained with APC-conjugated 26.5  $\alpha$ -MR1 antibody,  
449  $\alpha$ -W6/32 antibody, or isotype control antibody for 40 minutes at 4°C. Cells were washed, fixed  
450 with 1% paraformaldehyde and analyzed with a Beckman Coulter CytoflexS. All analyses were  
451 performed using FlowJo10 (TreeStar).

452

453 **IL-18 expression**

454 IL-18 immunoassay was performed using the ProQuantum Human IL-18 Immunoassay Kit  
455 (A35613, Invitrogen) per manufacturer's protocols with a 1:3 dilution of supernatants collected  
456 from primary BEC following indicated infection with *S. pneumoniae* and incubation with  
457 D426G11 MAIT cell clones.

458

459 **Data analysis**

460 ELISPOT statistical analysis was performed using R 3.6.3 and packages such as ggplot2, dplyr,  
461 lem4, afex, emmeans and multcomp. The lmer function in lme4 package was used to do the  
462 analysis and first the best fitting model structure was searched using the anova function  
463 implementing likelihood ratio test. The linear mixed effects model with square root  
464 transformation of SFU was used to analyze the data. Post-hoc tests to determine group

465 differences were run using function `glht` from package `multcomp` (to compare groups and  
466 perform a z-test) and function `emmeans` (Estimated Marginal Means) from package `emmeans` (to  
467 perform t-tests for pairwise comparisons). All other data were analyzed using Prism 8  
468 (GraphPad) or R 4.0 using packages such as `ggplot2`, `kableExtra`, `ggh4x`, and `ggbeeswarm`.  
469 Statistical significance was determined as indicated by pairwise t test or two-way ANOVA with  
470 Bonferroni's multiple comparisons, using  $\alpha=0.05$ . All images were analyzed using Imaris  
471 (Bitplane) as in <sup>39,40</sup>.

472

### 473 **Acknowledgements:**

474 The D426G11 MAIT cell clone was a kind gift from Dr. David Lewinsohn. We thank Dr. Suil  
475 Kim at VA Portland Health Care System for technical advice on cigarette smoke extract  
476 preparation and use. We also thank Dr. Yalda Zarnegarnia and Jack Wiedrick of the Oregon  
477 Health & Science University Biostatistics & Design Program for their assistance in statistical  
478 analysis. The DeltaVision Core DV microscope is supported in part by NIH S10 RR023432.

479

### 480 **Funding**

481 This work was supported by VA Merit Award I01 CX001562 (MJH), and in part by NIH R01  
482 AI129976 (MJH) and NIH T32 1T32GM137794-05 (MEH). The contents do not represent the  
483 views of the U.S. Department of Veterans Affairs or the U.S. government.

484

485



486 **References:**

- 487 1 Organization, W. H. *WHO global report on trends in prevalence of tobacco use 2000-2025*. 3rd  
488 edn, vii, 99 p. (World Health Organization, 2019).
- 489 2 Sopori, M. Effects of cigarette smoke on the immune system. *Nat. Rev. Immunol.* **2**, 372-377,  
490 doi:10.1038/nri803 (2002).
- 491 3 Stampfli, M. R. & Anderson, G. P. How cigarette smoke skews immune responses to promote  
492 infection, lung disease and cancer. *Nat Rev Immunol* **9**, 377-384, doi:10.1038/nri2530 (2009).
- 493 4 Nuorti, J. P. *et al.* Cigarette smoking and invasive pneumococcal disease. Active Bacterial Core  
494 Surveillance Team. *N. Engl. J. Med.* **342**, 681-689, doi:10.1056/NEJM200003093421002 (2000).
- 495 5 Eltom, S. *et al.* P2X7 receptor and caspase 1 activation are central to airway inflammation  
496 observed after exposure to tobacco smoke. *PLoS One* **6**, e24097,  
497 doi:10.1371/journal.pone.0024097 (2011).
- 498 6 Kang, M. J. *et al.* IL-18 is induced and IL-18 receptor alpha plays a critical role in the  
499 pathogenesis of cigarette smoke-induced pulmonary emphysema and inflammation. *J. Immunol.*  
500 **178**, 1948-1959, doi:10.4049/jimmunol.178.3.1948 (2007).
- 501 7 Yi, G. *et al.* A large lung gene expression study identifying IL1B as a novel player in airway  
502 inflammation in COPD airway epithelial cells. *Inflamm. Res.* **67**, 539-551, doi:10.1007/s00011-  
503 018-1145-8 (2018).
- 504 8 Churg, A., Cosio, M. & Wright, J. L. Mechanisms of cigarette smoke-induced COPD: insights from  
505 animal models. *Am. J. Physiol. Lung Cell Mol. Physiol.* **294**, L612-631,  
506 doi:10.1152/ajplung.00390.2007 (2008).
- 507 9 Kang, X. Z. & Chen, K. N. [Chronic obstructive pulmonary disease and lung cancer: advances in  
508 the study of epigenetic modification enzymes]. *Zhonghua Jie He He Hu Xi Za Zhi* **35**, 286-288  
509 (2012).
- 510 10 Strzelak, A., Ratajczak, A., Adamiec, A. & Feleszko, W. Tobacco Smoke Induces and Alters  
511 Immune Responses in the Lung Triggering Inflammation, Allergy, Asthma and Other Lung  
512 Diseases: A Mechanistic Review. *Int. J. Environ. Res. Public Health* **15**,  
513 doi:10.3390/ijerph15051033 (2018).
- 514 11 Grigg, J. *et al.* Cigarette smoke and platelet-activating factor receptor dependent adhesion of  
515 *Streptococcus pneumoniae* to lower airway cells. *Thorax* **67**, 908-913, doi:10.1136/thoraxjnl-  
516 2011-200835 (2012).
- 517 12 Drannik, A. G. *et al.* Impact of cigarette smoke on clearance and inflammation after  
518 *Pseudomonas aeruginosa* infection. *Am J Respir Crit Care Med* **170**, 1164-1171,  
519 doi:10.1164/rccm.200311-1521OC (2004).
- 520 13 Gou, X. *et al.* Repeated Exposure to *Streptococcus pneumoniae* Exacerbates Chronic Obstructive  
521 Pulmonary Disease. *Am. J. Pathol.* **189**, 1711-1720, doi:10.1016/j.ajpath.2019.05.012 (2019).
- 522 14 Barnes, P. J. *et al.* Chronic obstructive pulmonary disease. *Nat Rev Dis Primers* **1**, 15076,  
523 doi:10.1038/nrdp.2015.76 (2015).
- 524 15 Vestbo, J. *et al.* Global strategy for the diagnosis, management, and prevention of chronic  
525 obstructive pulmonary disease: GOLD executive summary. *Am J Respir Crit Care Med* **187**, 347-  
526 365, doi:10.1164/rccm.201204-0596PP (2013).
- 527 16 Organization, W. H. The top 10 causes of death. (2020).
- 528 17 Curtis, J. L., Freeman, C. M. & Hogg, J. C. The immunopathogenesis of chronic obstructive  
529 pulmonary disease: insights from recent research. *Proc Am Thorac Soc* **4**, 512-521,  
530 doi:10.1513/pats.200701-002FM (2007).

- 531 18 Saetta, M. *et al.* CD8+ T-lymphocytes in peripheral airways of smokers with chronic obstructive  
532 pulmonary disease. *Am J Respir Crit Care Med* **157**, 822-826, doi:10.1164/ajrccm.157.3.9709027  
533 (1998).
- 534 19 Williams, M., Todd, I. & Fairclough, L. C. The role of CD8 + T lymphocytes in chronic obstructive  
535 pulmonary disease: a systematic review. *Inflamm. Res.* **70**, 11-18, doi:10.1007/s00011-020-  
536 01408-z (2021).
- 537 20 Motz, G. T. *et al.* Persistence of lung CD8 T cell oligoclonal expansions upon smoking cessation in  
538 a mouse model of cigarette smoke-induced emphysema. *J. Immunol.* **181**, 8036-8043,  
539 doi:10.4049/jimmunol.181.11.8036 (2008).
- 540 21 Treiner, E. *et al.* Selection of evolutionarily conserved mucosal-associated invariant T cells by  
541 MR1. *Nature* **422**, 164-169, doi:10.1038/nature01433 (2003).
- 542 22 Hinks, T. S. *et al.* Steroid-induced Deficiency of Mucosal-associated Invariant T Cells in the  
543 Chronic Obstructive Pulmonary Disease Lung. Implications for Nontypeable Haemophilus  
544 influenzae Infection. *Am J Respir Crit Care Med* **194**, 1208-1218, doi:10.1164/rccm.201601-  
545 0002OC (2016).
- 546 23 Kwon, Y. S. *et al.* Mucosal-Associated Invariant T Cell Deficiency in Chronic Obstructive  
547 Pulmonary Disease. *COPD* **13**, 196-202, doi:10.3109/15412555.2015.1069806 (2016).
- 548 24 Qiu, W. *et al.* Mucosal Associated Invariant T Cells Were Activated and Polarized Toward Th17 in  
549 Chronic Obstructive Pulmonary Disease. *Front Immunol* **12**, 640455,  
550 doi:10.3389/fimmu.2021.640455 (2021).
- 551 25 Szabo, M. *et al.* Deficiency of innate-like T lymphocytes in chronic obstructive pulmonary  
552 disease. *Respir Res* **18**, 197, doi:10.1186/s12931-017-0671-1 (2017).
- 553 26 Eckle, S. B. *et al.* A molecular basis underpinning the T cell receptor heterogeneity of mucosal-  
554 associated invariant T cells. *J. Exp. Med.* **211**, 1585-1600, doi:10.1084/jem.20140484 (2014).
- 555 27 Kjer-Nielsen, L. *et al.* MR1 presents microbial vitamin B metabolites to MAIT cells. *Nature* **491**,  
556 717-723, doi:10.1038/nature11605 (2012).
- 557 28 Hartmann, N. *et al.* Role of MAIT cells in pulmonary bacterial infection. *Mol. Immunol.* **101**, 155-  
558 159, doi:10.1016/j.molimm.2018.06.270 (2018).
- 559 29 Hartmann, N. *et al.* Riboflavin Metabolism Variation among Clinical Isolates of Streptococcus  
560 pneumoniae Results in Differential Activation of Mucosal-associated Invariant T Cells. *Am. J.*  
561 *Respir. Cell Mol. Biol.* **58**, 767-776, doi:10.1165/rcmb.2017-0290OC (2018).
- 562 30 Kurioka, A. *et al.* Diverse Streptococcus pneumoniae Strains Drive a Mucosal-Associated  
563 Invariant T-Cell Response Through Major Histocompatibility Complex class I-Related Molecule-  
564 Dependent and Cytokine-Driven Pathways. *J Infect Dis* **217**, 988-999, doi:10.1093/infdis/jix647  
565 (2018).
- 566 31 Ussher, J. E. *et al.* CD161<sup>++</sup> CD8<sup>+</sup> T cells, including the MAIT cell subset, are specifically activated  
567 by IL-12+IL-18 in a TCR-independent manner. *Eur. J. Immunol.* **44**, 195-203,  
568 doi:10.1002/eji.201343509 (2014).
- 569 32 Kang, M. J. *et al.* IL-18 induces emphysema and airway and vascular remodeling via IFN-gamma,  
570 IL-17A, and IL-13. *Am J Respir Crit Care Med* **185**, 1205-1217, doi:10.1164/rccm.201108-1545OC  
571 (2012).
- 572 33 Gold, M. C. *et al.* Human mucosal associated invariant T cells detect bacterially infected cells.  
573 *PLoS Biol* **8**, e1000407, doi:10.1371/journal.pbio.1000407 (2010).
- 574 34 Gold, M. C. *et al.* MR1-restricted MAIT cells display ligand discrimination and pathogen  
575 selectivity through distinct T cell receptor usage. *J Exp Med* **211**, 1601-1610,  
576 doi:10.1084/jem.20140507 (2014).

- 577 35 Murakami, D. *et al.* Exposure to Cigarette Smoke Enhances Pneumococcal Transmission Among  
578 Littermates in an Infant Mouse Model. *Front Cell Infect Microbiol* **11**, 651495,  
579 doi:10.3389/fcimb.2021.651495 (2021).
- 580 36 El Ahmer, O. R. *et al.* The effect of cigarette smoke on adherence of respiratory pathogens to  
581 buccal epithelial cells. *FEMS Immunol Med Microbiol* **23**, 27-36 (1999).
- 582 37 Mahajan, B. & Panhotra, B. R. Adherence of Streptococcus pneumoniae to buccal epithelial cells  
583 of smokers & non-smokers. *The Indian journal of medical research* **89**, 381-383 (1989).
- 584 38 McWilliam, H. E. G. & Villadangos, J. A. How MR1 Presents a Pathogen Metabolic Signature to  
585 Mucosal-Associated Invariant T (MAIT) Cells. *Trends Immunol.* **38**, 679-689,  
586 doi:10.1016/j.it.2017.06.005 (2017).
- 587 39 Harriff, M. J. *et al.* Endosomal MR1 Trafficking Plays a Key Role in Presentation of  
588 Mycobacterium tuberculosis Ligands to MAIT Cells. *PLoS Pathog* **12**, e1005524,  
589 doi:10.1371/journal.ppat.1005524 (2016).
- 590 40 Huber, M. E. *et al.* Rab6 regulates recycling and retrograde trafficking of MR1 molecules. *Sci Rep*  
591 **10**, 20778, doi:10.1038/s41598-020-77563-4 (2020).
- 592 41 Le Bourhis, L. *et al.* Antimicrobial activity of mucosal-associated invariant T cells. *Nat Immunol*  
593 **11**, 701-708, doi:10.1038/ni.1890 (2010).
- 594 42 Godfrey, D. I., Koay, H. F., McCluskey, J. & Gherardin, N. A. The biology and functional  
595 importance of MAIT cells. *Nat Immunol* **20**, 1110-1128, doi:10.1038/s41590-019-0444-8 (2019).
- 596 43 Nel, I., Bertrand, L., Toubal, A. & Lehuen, A. MAIT cells, guardians of skin and mucosa? *Mucosal*  
597 *Immunol* **14**, 803-814, doi:10.1038/s41385-021-00391-w (2021).
- 598 44 Meierovics, A., Yankelevich, W. J. & Cowley, S. C. MAIT cells are critical for optimal mucosal  
599 immune responses during in vivo pulmonary bacterial infection. *Proc Natl Acad Sci U S A* **110**,  
600 E3119-3128, doi:10.1073/pnas.1302799110 (2013).
- 601 45 Meierovics, A. I. & Cowley, S. C. MAIT cells promote inflammatory monocyte differentiation into  
602 dendritic cells during pulmonary intracellular infection. *J Exp Med* **213**, 2793-2809,  
603 doi:10.1084/jem.20160637 (2016).
- 604 46 Christenson, S. A. *et al.* An airway epithelial IL-17A response signature identifies a steroid-  
605 unresponsive COPD patient subgroup. *The Journal of clinical investigation* **129**, 169-181,  
606 doi:10.1172/JCI121087 (2019).
- 607 47 Imaoka, H. *et al.* Interleukin-18 production and pulmonary function in COPD. *Eur Respir J* **31**,  
608 287-297, doi:10.1183/09031936.00019207 (2008).
- 609 48 Petersen, A. M. *et al.* Elevated levels of IL-18 in plasma and skeletal muscle in chronic  
610 obstructive pulmonary disease. *Lung* **185**, 161-171, doi:10.1007/s00408-007-9000-7 (2007).
- 611 49 Rebuli, M. E. *et al.* Electronic-Cigarette Use Alters Nasal Mucosal Immune Response to Live-  
612 attenuated Influenza Virus. A Clinical Trial. *Am J Respir Cell Mol Biol* **64**, 126-137,  
613 doi:10.1165/rcmb.2020-0164OC (2021).
- 614 50 Sundar, I. K. *et al.* DNA methylation profiling in peripheral lung tissues of smokers and patients  
615 with COPD. *Clin Epigenetics* **9**, 38, doi:10.1186/s13148-017-0335-5 (2017).
- 616 51 Taraseviciene-Stewart, L. *et al.* Is alveolar destruction and emphysema in chronic obstructive  
617 pulmonary disease an immune disease? *Proc Am Thorac Soc* **3**, 687-690,  
618 doi:10.1513/pats.200605-105SF (2006).
- 619 52 Crowther, M. D. *et al.* Genome-wide CRISPR-Cas9 screening reveals ubiquitous T cell cancer  
620 targeting via the monomorphic MHC class I-related protein MR1. *Nat Immunol* **21**, 178-185,  
621 doi:10.1038/s41590-019-0578-8 (2020).
- 622 53 Corbett, A. J. *et al.* T-cell activation by transitory neo-antigens derived from distinct microbial  
623 pathways. *Nature* **509**, 361-365, doi:10.1038/nature13160 (2014).

- 624 54 Nguyen, J. M. K., Robinson, D. N. & Sidhaye, V. K. Why new biology must be uncovered to  
625 advance therapeutic strategies for chronic obstructive pulmonary disease. *American journal of*  
626 *physiology. Lung cellular and molecular physiology* **320**, L1-L11, doi:10.1152/ajplung.00367.2020  
627 (2021).
- 628 55 Lewinsohn, D. M., Briden, A. L., Reed, S. G., Grabstein, K. H. & Alderson, M. R. Mycobacterium  
629 tuberculosis-reactive CD8+ T lymphocytes: the relative contribution of classical versus  
630 nonclassical HLA restriction. *J. Immunol.* **165**, 925-930, doi:10.4049/jimmunol.165.2.925 (2000).
- 631 56 Narayanan, G. A. *et al.* Alternative splicing of MR1 regulates antigen presentation to MAIT cells.  
632 *Sci Rep* **10**, 15429, doi:10.1038/s41598-020-72394-9 (2020).
- 633 57 Karamooz, E., Harriff, M. J., Narayanan, G. A., Worley, A. & Lewinsohn, D. M. MR1 recycling and  
634 blockade of endosomal trafficking reveal distinguishable antigen presentation pathways  
635 between Mycobacterium tuberculosis infection and exogenously delivered antigens. *Sci Rep* **9**,  
636 4797, doi:10.1038/s41598-019-41402-y (2019).
- 637 58 Dusser, D. J., Djokic, T. D., Borson, D. B. & Nadel, J. A. Cigarette smoke induces  
638 bronchoconstrictor hyperresponsiveness to substance P and inactivates airway neutral  
639 endopeptidase in the guinea pig. Possible role of free radicals. *J. Clin. Invest.* **84**, 900-906,  
640 doi:10.1172/JCI114251 (1989).
- 641 59 Heinzl, A. S. *et al.* HLA-E-dependent presentation of Mtb-derived antigen to human CD8+ T  
642 cells. *J. Exp. Med.* **196**, 1473-1481, doi:10.1084/jem.20020609 (2002).
- 643 60 Livak, K. J. & Schmittgen, T. D. Analysis of relative gene expression data using real-time  
644 quantitative PCR and the 2(-Delta Delta C(T)) Method. *Methods* **25**, 402-408,  
645 doi:10.1006/meth.2001.1262 (2001).
- 646
- 647

648 **Figure 1. Primary BEC elicit microbe-independent, MR1-dependent responses by MAIT**  
649 **cells.** a) Primary BEC from healthy (n=7), COPD (n=6), or smoker (n=6) donors were incubated  
650 with the D426 G11 MAIT cell clone in an ELISPOT assay with IFN- $\gamma$  production as the readout.  
651 Data points are the mean IFN- $\gamma$  spot-forming units (SFU) of two technical replicates per donor.  
652 Statistical analysis was performed as described in the experimental procedures and is  
653 summarized in Table 2. b-c) BEC from a representative healthy and COPD donor were incubated  
654 with blocking antibodies to IL-12/IL-18 or MR1 five hours prior to addition of the MAIT cells in  
655 an IFN- $\gamma$  ELISPOT assay. Results are presented as b) the mean of two experimental replicates  
656 and c) representative ELISPOT well images.

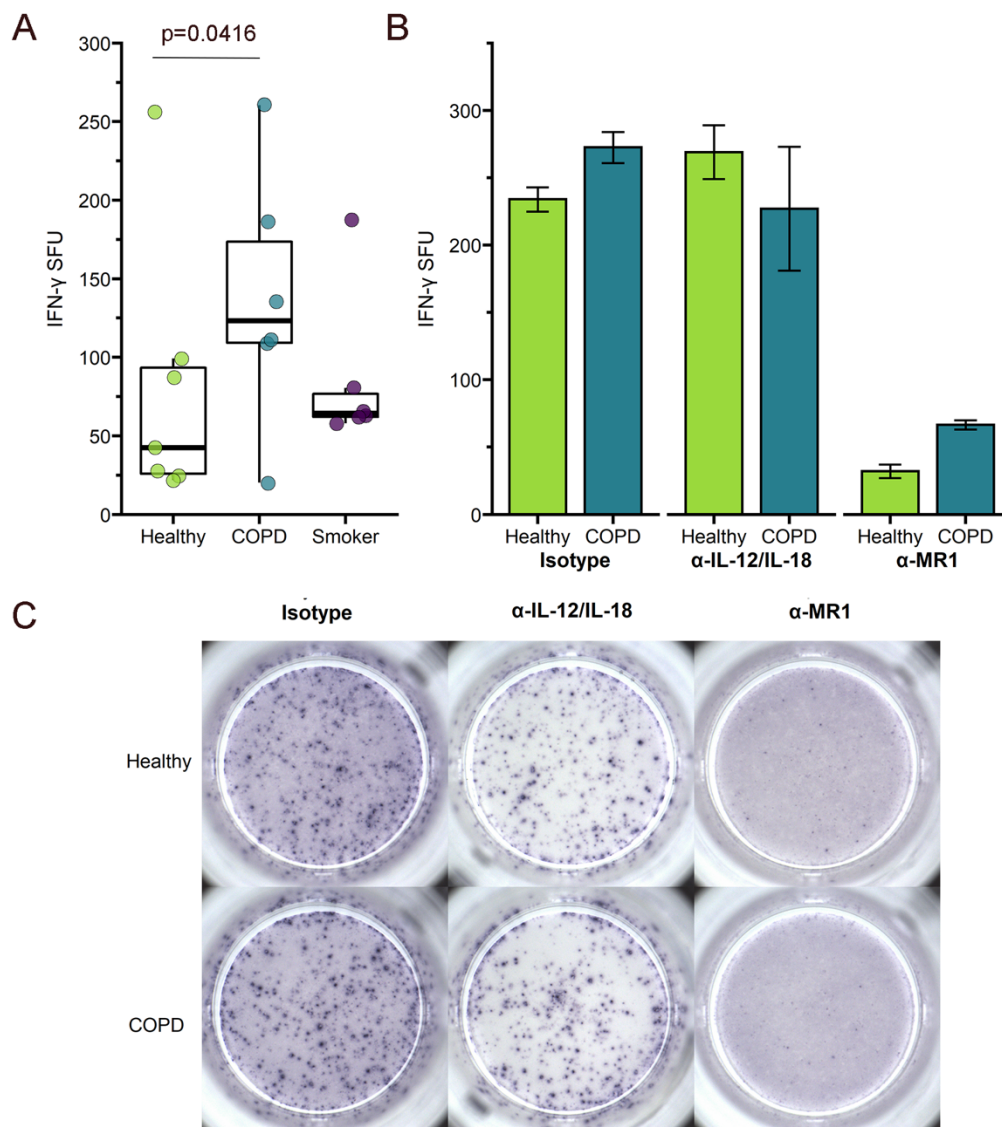

658 **Figure 2. Increased microbe-dependent, MR1-dependent MAIT cell response to infected**  
659 **BEC from COPD donors.** a) Primary BEC from healthy, COPD, or smoker donors were  
660 infected with media control, *M. smegmatis* (0.1 $\mu$ l/well), or *S. pneumoniae* (MOI 20) for one hour  
661 prior to addition of MAIT cells in an IFN- $\gamma$  ELISPOT assay. Data points are the mean IFN- $\gamma$   
662 spot-forming units (SFU) of two technical replicates per donor. Statistical analysis was  
663 performed as described in the experimental procedures and is summarized in Table 3. b) BEC  
664 from a representative healthy and COPD donor were incubated with blocking antibodies to  
665 IL-12/IL-18 or MR1 one hour prior to infection with *S. pneumoniae* (MOI 20) and subsequent  
666 addition of the MAIT cell clones in an IFN- $\gamma$  ELISPOT assay. Results are presented as the mean  
667 of two experimental replicates.

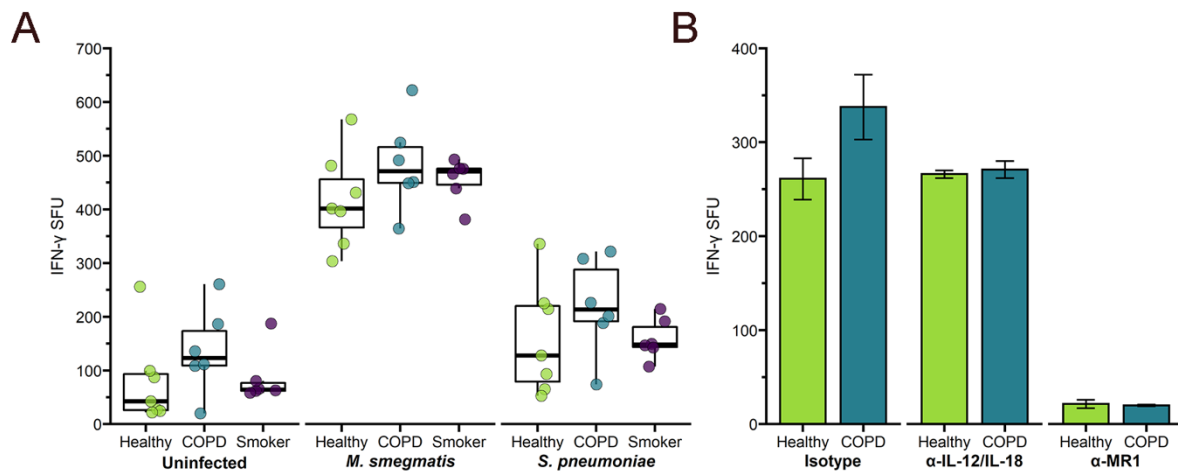

668 **Figure 3: Increased infection of primary BEC from COPD donors.** a-b) BEC from  
669 representative healthy, COPD, or smoker donors were infected with fluorescently labeled *S.*  
670 *pneumoniae* for three hours. Fixed cells were stained with DAPI and  $\alpha$ -MHC-Ia antibody to label  
671 the cell surface. Approximately 20 fields per donor were selected without bias based on nuclear  
672 stain, and whole cells within these fields were then analyzed by Imaris to enumerate the number  
673 of bacteria associated with individual cells. a) Data points indicate individual cells, analyzed by  
674 one-way ANOVA statistical analysis. b) Representative images of *S. pneumoniae*-infected  
675 primary BEC. White = MHC-Ia surface staining. Red pseudocolor = fluorescent *S. pneumoniae*.  
676 Arrows indicate adherent *S. pneumoniae* (yellow) enumerated for analysis. c) IFN- $\gamma$  SFU fold  
677 change between no-treatment control and *M. smegmatis*- or *S. pneumoniae*-infected primary  
678 BEC from healthy, COPD, or smoker donors. Raw data shown in Figure 2a. Statistical analysis  
679 was performed as described in the experimental procedures and is summarized in Table 2.

680

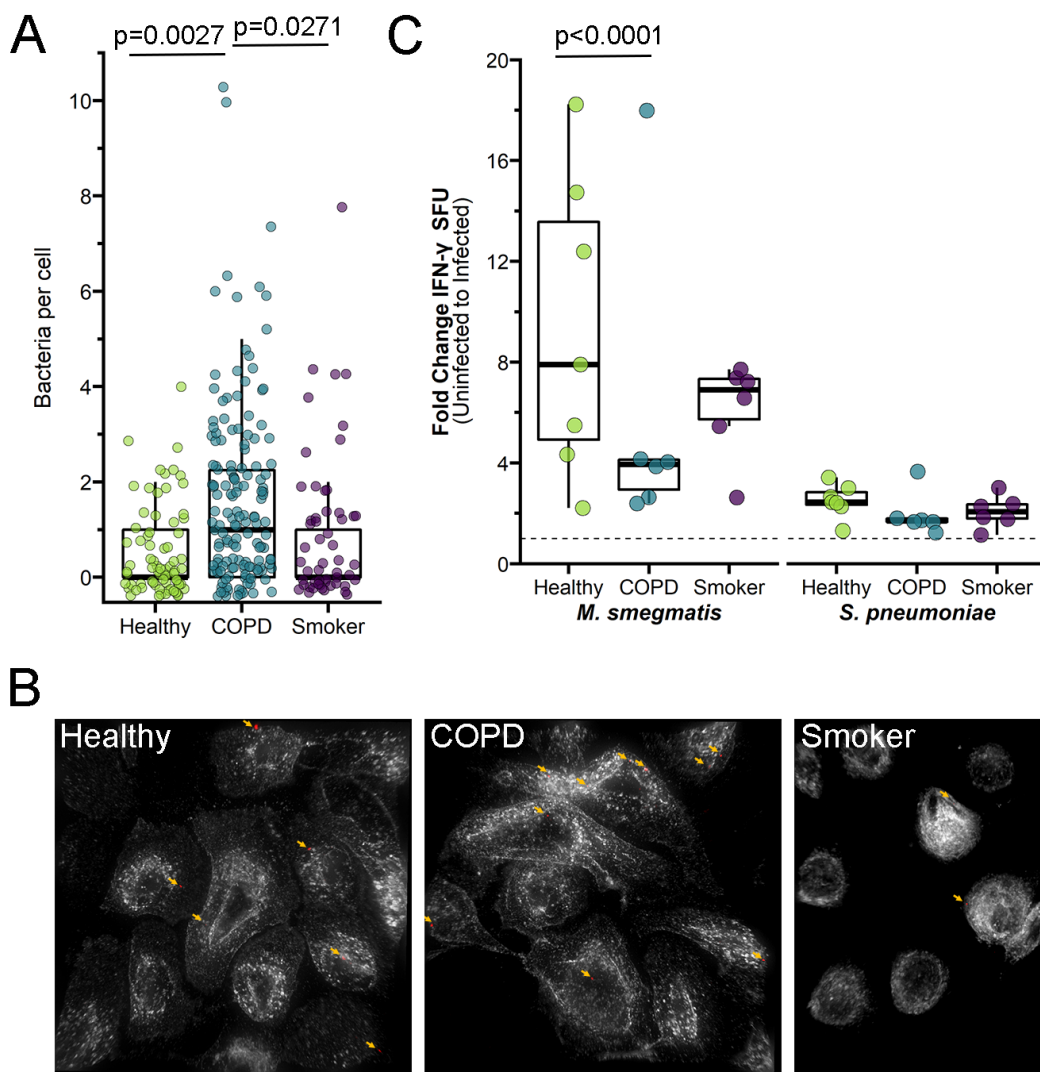

681

682

683 **Figure 3.**



684 **Figure 4: Decreased MAIT cell responses to primary BEC following treatment with**  
685 **cigarette smoke extract (CSE).** a-b) Primary BEC from healthy (n=7), COPD (n=6), or smoker  
686 (n=6) donors were incubated with media containing 0% or 30% CSE for three hours prior to the  
687 addition of MAIT cells in an IFN- $\gamma$  ELISPOT assay. Statistical analysis was performed as  
688 described in the experimental procedures and is summarized in Tables 2-3. a) Data points are the  
689 mean IFN- $\gamma$  spot-forming units (SFU) of two technical replicates, paired by individual donor.  
690 b) IFN- $\gamma$  SFU fold change between 0% CSE- and 30% CSE-treated primary BEC from healthy,  
691 COPD, or smoker donors, calculated pairwise by donor.  
692

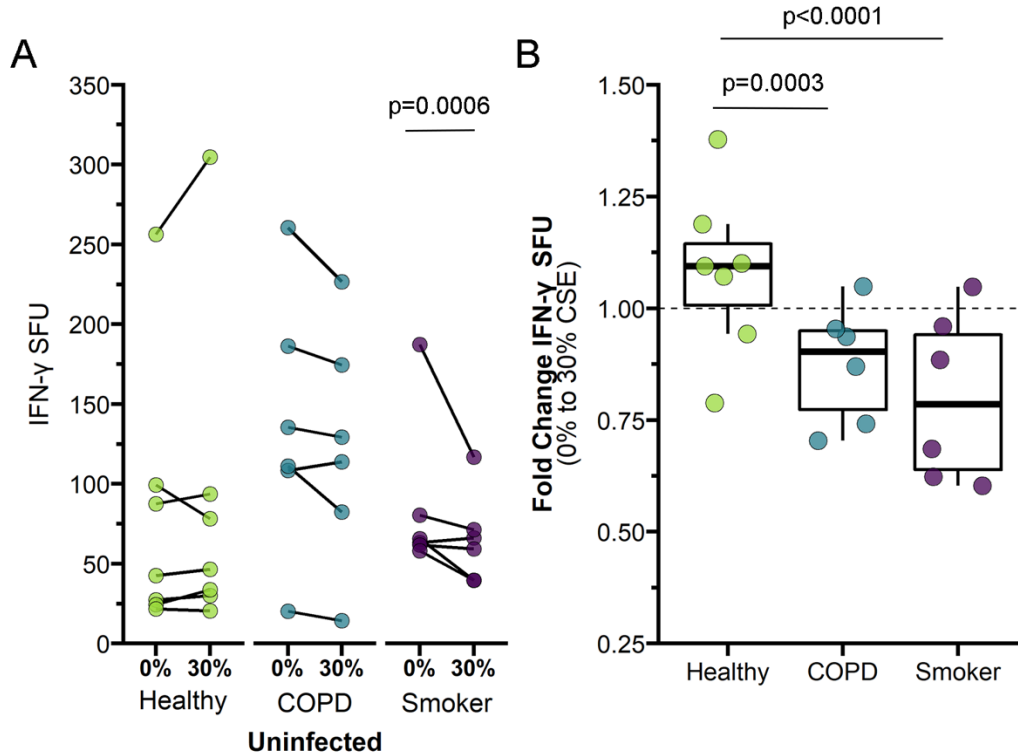

693 **Figure 5: Reduced MAIT cell responses to infected BEC following treatment with CSE.**

694 a-b) Primary BEC from healthy (n=7), COPD (n=6), or smoker (n=6) donors were incubated  
695 with media containing 0% or 30% CSE for three hours. BEC were infected with *M. smegmatis*  
696 (a, 0.05 $\mu$ l/well) or *S. pneumoniae* (b, 20 MOI) for one hour prior to the addition of MAIT cells in  
697 an IFN- $\gamma$  ELISPOT assay. Statistical analysis was performed as described in the experimental  
698 procedures and is summarized in Table 2-3. c) Fold change of a) and b) IFN- $\gamma$  SFU between 0%  
699 CSE- and 30% CSE-treated primary BEC infected with *M. smegmatis* or *S. pneumoniae*,  
700 calculated pairwise by donor. d-e) BEC from representative healthy, COPD, or smoker donors  
701 were incubated with medium containing 0% or 30% CSE for three hours, then infected with  
702 fluorescently labeled *S. pneumoniae* for three hours. Fixed cells were stained with DAPI and  
703  $\alpha$ -MHC-Ia antibody to label the cell surface. Approximately 20 fields per donor were selected  
704 without bias based on nuclear stain, and whole cells within these fields were then analyzed by  
705 Imaris to enumerate the number of bacteria associated with individual cells. d) Representative  
706 images of *S. pneumoniae*-infected healthy BEC treated with 0% or 30% CSE. White = MHC-Ia  
707 surface staining. Red pseudocolor = fluorescent *S. pneumoniae*. Arrows indicate adherent *S.*  
708 *pneumoniae* (yellow) enumerated for analysis or extracellular microbes (red) excluded for  
709 analysis. e) Data points indicate individual cells, analyzed by one-way ANOVA statistical  
710 analysis. 0% CSE results from Figure 3a are included as reference.

711

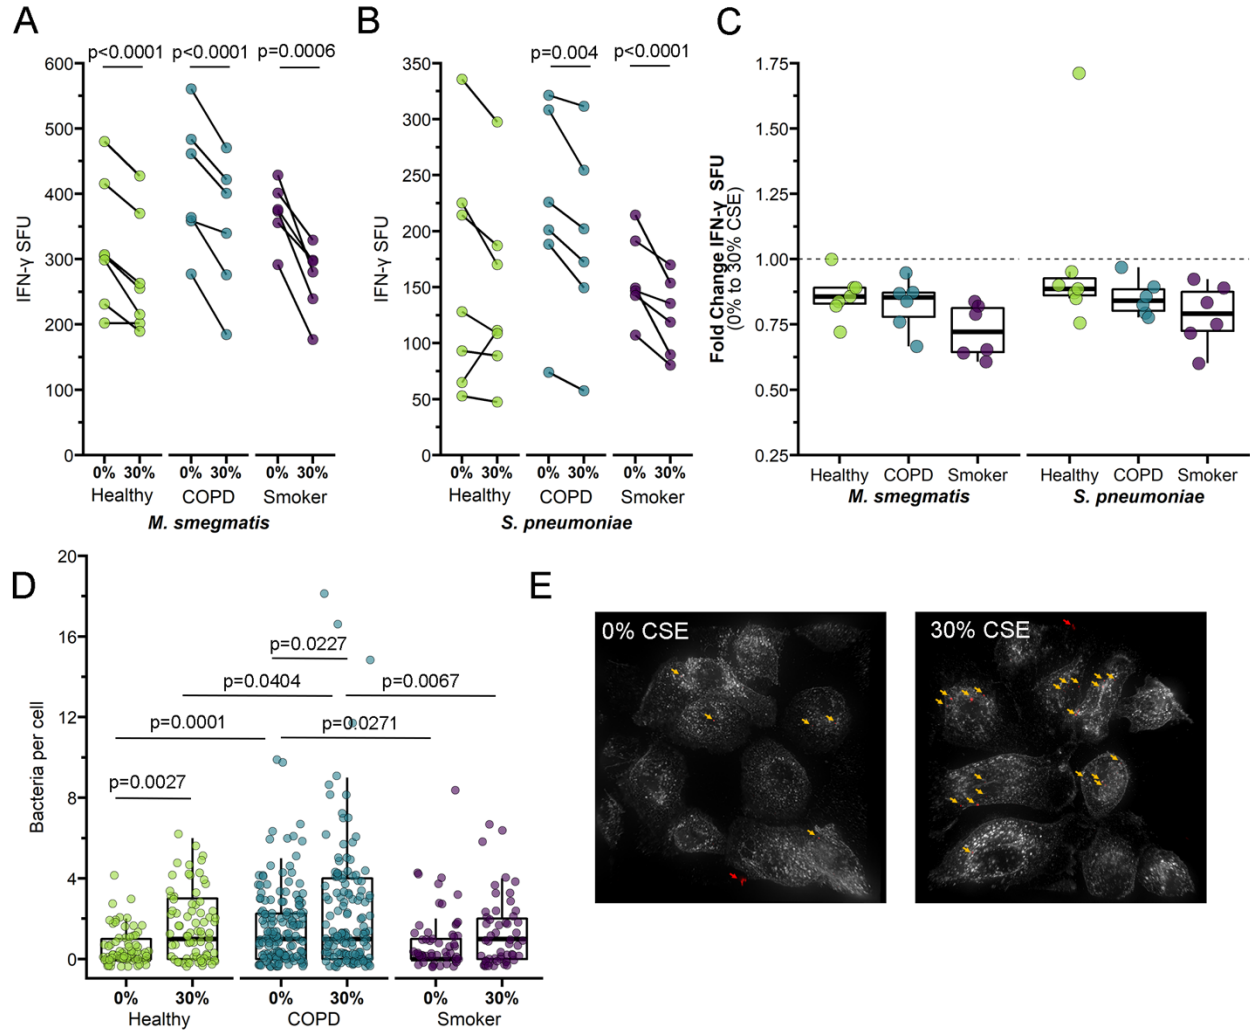

712 **Figure 5.**

713 **Figure 6: Increased MR1 expression in primary BEC exposed to cigarette smoke.** a) RNA  
714 was isolated from healthy, COPD, or smoker donor BEC (n=5) and RT-PCR was performed to  
715 detect amplification of *MR1* and the internal control, *HPRT1*. Data points are the mean  $\Delta C_t$  of  
716 three technical replicates per donor. Statistical analysis performed by two-way ANOVA with  
717 Bonferroni's multiple comparisons. b) Primary BEC from healthy, COPD, or smoker donors  
718 (n=5) were incubated with 0% or 30% CSE for 3 hours. RNA was isolated from BEC and RT-  
719 PCR was performed to detect amplification of *MR1* and the internal control, *HPRT1*. Relative  
720 mRNA  $2^{-\Delta\Delta C_t}$  calculations were performed relative to no-treatment pairwise control and *HPRT1*  
721 expression. Two tailed paired t-tests were performed to determine statistical significance; p value  
722  $> 0.05$  for all comparisons. c-d) Primary BEC from healthy, COPD, or smoker donors (n=5)  
723 were d) incubated with 0% or 30% CSE for three hours, then c-d) incubated overnight with the  
724 MAIT cell ligand 6-formylpterin (6-FP) prior to harvest and staining for surface expression of  
725 MR1 by flow cytometry. Two-tailed paired t tests were performed to determine statistical  
726 significance.

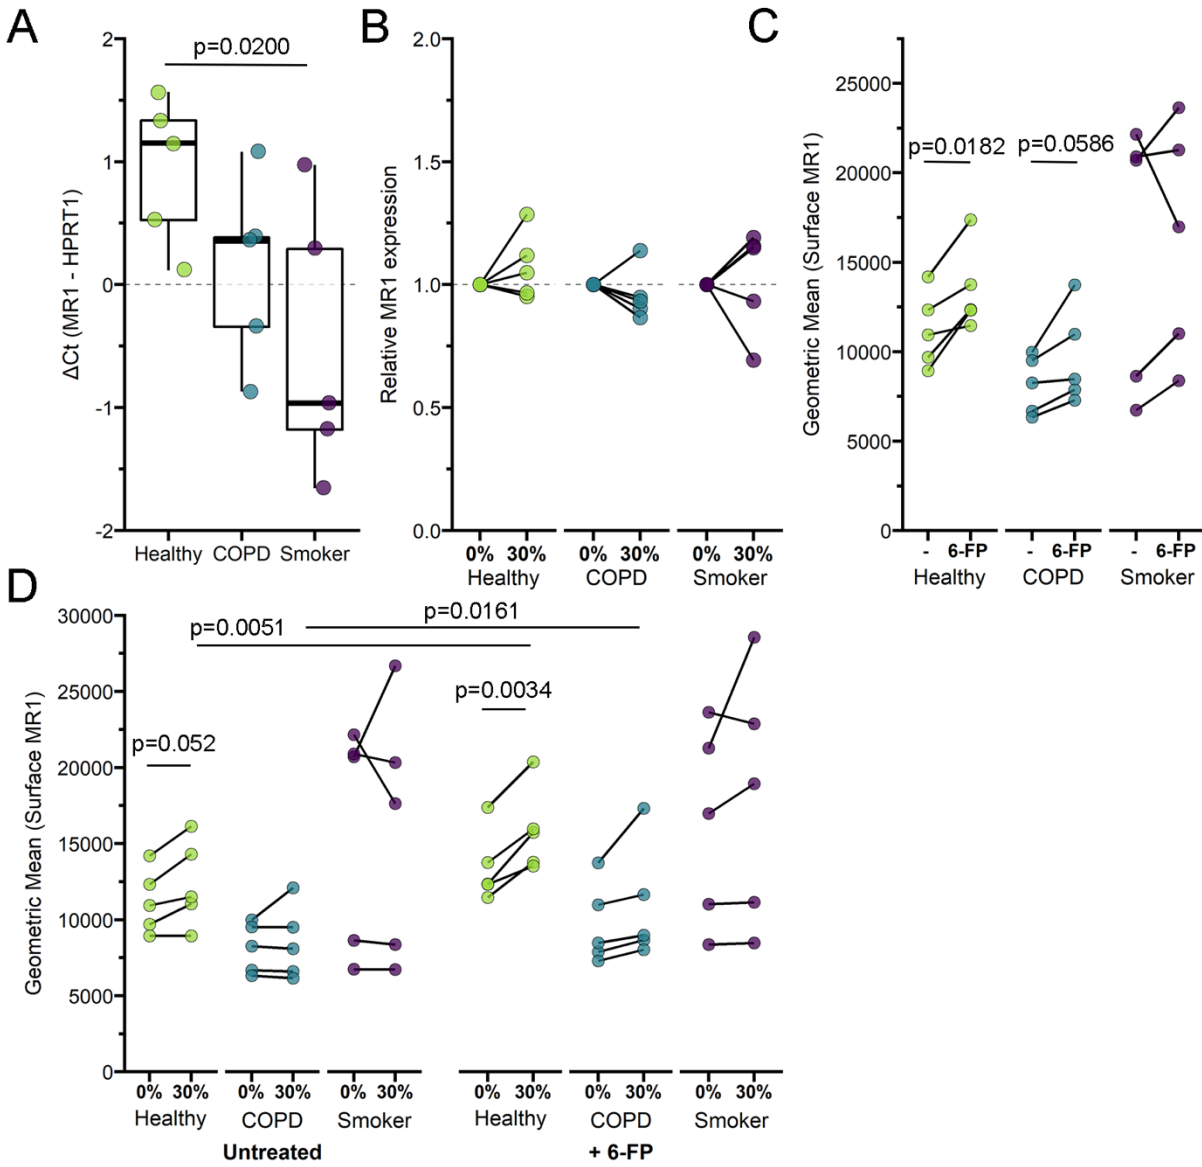

727 **Figure 6.**

728 **Supplemental Figure 1: BEAS-2b cells elicit MAIT cell responses.** BEAS-2b cells were  
729 incubated with media control (“Uninfected”) or infected with *M. smegmatis* (0.05 $\mu$ l/well) or *S.*  
730 *pneumoniae* (20 MOI) for one hour prior to addition of MAIT cells in an IFN- $\gamma$  ELISPOT assay.  
731 Data points are the mean IFN- $\gamma$  spot-forming units (SFU) of two technical replicates each from  
732 24 experiments.  
733

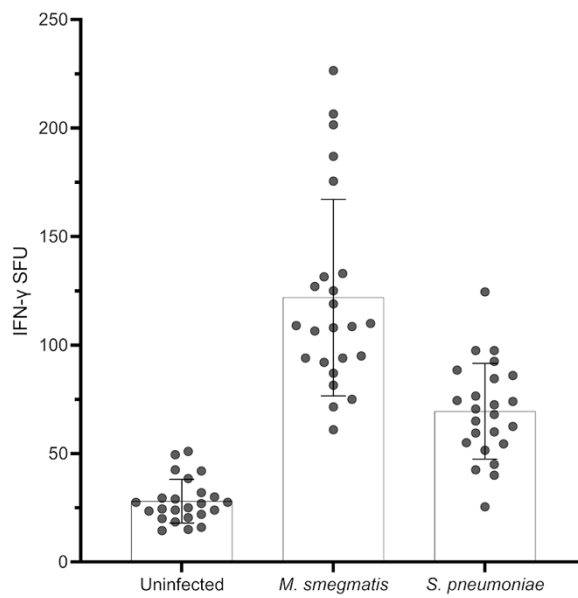

734 **Supplemental Figure 2: IL-18 secretion by primary BEC**

735 Cell supernatants were collected from a representative healthy, COPD, and smoker donor BEC

736 treated as indicated. IL-18 secretion was quantified from cell supernatants by immunoassay.

737

738

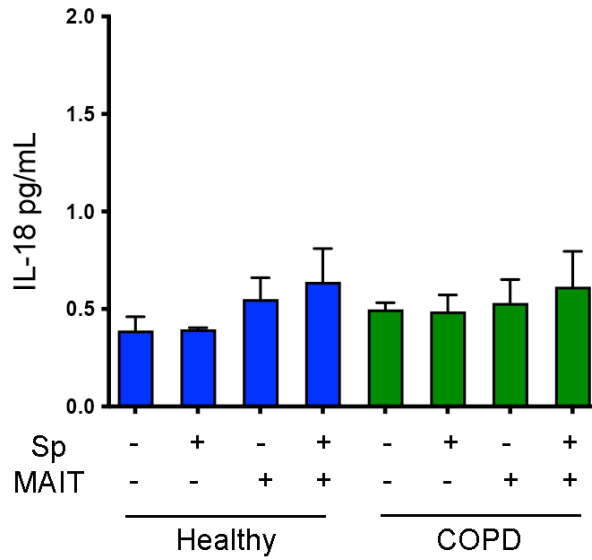

739 **Supplemental Figure 3: Expression of MR1 and MHC-Ia in the BEAS-2B cell line.**

740 BEAS-2B:doxMR1-GFP cells were treated with doxycycline 24 hours prior to overnight

741 incubation with 6-FP. Cells were stained and analyzed by flow for total cellular doxMR1-GFP

742 expression (left) or for surface expression of MR1 (right).

743

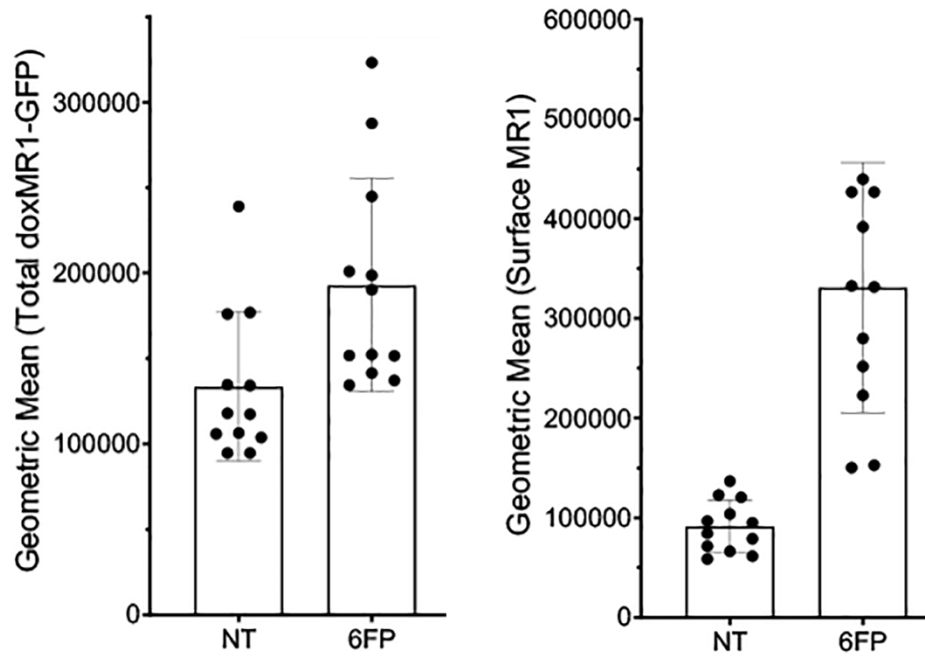

758





**Table 1.** Description of bronchial epithelial cell (BEC) donors

| Donor information                                                                                                                                                                                                                                                                                                                          |     |                  |        | Medical History                         |                                 |                                                                          | Assays Performed |                |                |
|--------------------------------------------------------------------------------------------------------------------------------------------------------------------------------------------------------------------------------------------------------------------------------------------------------------------------------------------|-----|------------------|--------|-----------------------------------------|---------------------------------|--------------------------------------------------------------------------|------------------|----------------|----------------|
| ID                                                                                                                                                                                                                                                                                                                                         | Age | Sex              | Race*  | COPD Diagnosis                          | Smoking History**               | Smoking Notes                                                            | ELISPOT          | RT-PCR         | Flow cytometry |
| <b>Healthy</b>                                                                                                                                                                                                                                                                                                                             |     |                  |        |                                         |                                 |                                                                          |                  |                |                |
| H276                                                                                                                                                                                                                                                                                                                                       | 68  | M                | W      | -                                       | -                               | -                                                                        | Y                | Y              | Y              |
| H527                                                                                                                                                                                                                                                                                                                                       | 47  | M                | W      | -                                       | -                               | -                                                                        | Y                | Y              | Y              |
| H608                                                                                                                                                                                                                                                                                                                                       | 67  | M                | W      | -                                       | -                               | -                                                                        | Y                | Y              | Y              |
| H619                                                                                                                                                                                                                                                                                                                                       | 53  | M                | W      | -                                       | -                               | -                                                                        | Y                | Y              | Y              |
| H628                                                                                                                                                                                                                                                                                                                                       | 42  | M                | B      | -                                       | -                               | -                                                                        | Y                | N <sup>1</sup> | N <sup>1</sup> |
| H544                                                                                                                                                                                                                                                                                                                                       | 48  | M                | W      | -                                       | -                               | -                                                                        | Y                | N <sup>2</sup> | Y              |
| H063                                                                                                                                                                                                                                                                                                                                       | 57  | M                | W      | -                                       | -                               | -                                                                        | Y                | Y              | N <sup>3</sup> |
| <b>COPD</b>                                                                                                                                                                                                                                                                                                                                |     |                  |        |                                         |                                 |                                                                          |                  |                |                |
| C141                                                                                                                                                                                                                                                                                                                                       | 73  | M                | W      | 12 years;<br>Emphysema                  | 1-2 ppd;<br>20 years            | -                                                                        | Y                | Y              | Y              |
| C179                                                                                                                                                                                                                                                                                                                                       | 69  | M                | W      | Duration unknown;<br>inhaler            | 2-3 ppd;<br>40 years            | Decreased smoking (recent years);<br>Smoked marijuana (duration unknown) | Y                | Y              | Y              |
| C409                                                                                                                                                                                                                                                                                                                                       | 53  | M                | W      | Duration unknown;<br>inhaler and oxygen | 2 ppd;<br>27 years              | -                                                                        | Y                | Y              | Y              |
| <small>bioRxiv preprint doi: <a href="https://doi.org/10.1101/2022.02.28.482383">https://doi.org/10.1101/2022.02.28.482383</a>; this version posted March 2, 2022. The copyright holder for this preprint (which was not certified by peer review) is the author/funder. All rights reserved. No reuse allowed without permission.</small> |     |                  |        |                                         |                                 |                                                                          |                  |                |                |
| C415                                                                                                                                                                                                                                                                                                                                       | 53  | M                | B      | Duration unknown;<br>Emphysema          | 1 ppd;<br>20 years              | Quit smoking (5 years)                                                   | Y                | Y              | Y              |
| C436                                                                                                                                                                                                                                                                                                                                       | 59  | M                | W      | 20 years;<br>steroid inhalers           | 2-3 ppd;<br>35 years            | -                                                                        | Y                | Y              | Y              |
| C147                                                                                                                                                                                                                                                                                                                                       | 66  | M                | W      | 2 years                                 | 1.5 ppd;<br>40 years            | Quit smoking (10 years);<br>Smoked marijuana (daily, 49 years)           | Y                | N <sup>4</sup> | N <sup>3</sup> |
| <b>Smoker</b>                                                                                                                                                                                                                                                                                                                              |     |                  |        |                                         |                                 |                                                                          |                  |                |                |
| S118                                                                                                                                                                                                                                                                                                                                       | 56  | F <sup>***</sup> | B      | -                                       | 0.5 ppd;<br>26 years            | -                                                                        | Y                | Y              | Y              |
| S123                                                                                                                                                                                                                                                                                                                                       | 39  | M                | W      | -                                       | Occasional;<br>Unknown duration | -                                                                        | Y                | Y              | Y              |
| S149                                                                                                                                                                                                                                                                                                                                       | 57  | M                | W      | -                                       | 1 ppd;<br>12 years              | Quit smoking (23 years)                                                  | Y                | Y              | Y              |
| S150                                                                                                                                                                                                                                                                                                                                       | 55  | M                | Am Ind | -                                       | Unknown;<br>25 years            | -                                                                        | Y                | Y              | Y              |
| S151                                                                                                                                                                                                                                                                                                                                       | 41  | M                | W      | -                                       | Unknown;<br>25 years            | -                                                                        | Y                | Y              | Y              |
| S011                                                                                                                                                                                                                                                                                                                                       | 50  | M                | W      | -                                       | 0.5 ppd;<br>>20 years           | -                                                                        | Y                | N <sup>4</sup> | N <sup>3</sup> |

\* 'W' = 'white', 'B' = 'Black', 'Am Ind' = 'American Indian'

\*\* 'ppd' = 'packs per day'

\*\*\* Sole female donor

<sup>1</sup> Loss of cell viability following first expansion

<sup>2</sup> Failed to isolate RNA of sufficient quality and quantity

<sup>3</sup> Positive and negative flow cytometry controls failed

<sup>4</sup> Irregular amplification of internal reference gene

**Table 2.** Statistical analysis of ELISPOT data:  
Fixed effects results from linear mixed model

| Variable           | p value     |
|--------------------|-------------|
| Healthy            | (Intercept) |
| COPD               | 0.0416      |
| Smoker             | 0.5173      |
| CSE                | 0.5279      |
| <i>Msm</i>         | <0.0001     |
| <i>Sp</i>          | <0.0001     |
| COPD:CSE           | 0.0003      |
| Smoker:CSE         | <0.0001     |
| COPD: <i>Msm</i>   | <0.0001     |
| Smoker: <i>Msm</i> | 0.8718      |
| COPD: <i>Sp</i>    | 0.4193      |
| Smoker: <i>Sp</i>  | 0.2432      |
| CSE: <i>Msm</i>    | <0.0001     |
| CSE: <i>Sp</i>     | 0.0482      |

bioRxiv preprint doi: <https://doi.org/10.1101/2022.02.28.482383>; this version posted March 2, 2022. The copyright holder for this preprint (which was not certified by peer review) is the author/funder. All rights reserved. No reuse allowed without permission.

**Acronyms:**

*Msm* = *M. smegmatis*

*Sp* = *S. pneumoniae*

CSE = cigarette smoke extract

**Table 3.** Statistical analysis of ELISPOT data:  
Multiple comparisons of means

| Donor:                    | Infection:               | CSE treatment:  | p value |
|---------------------------|--------------------------|-----------------|---------|
| <b>Healthy</b>            |                          |                 |         |
|                           | UI vs. <i>Msm</i>        | noCSE           | <0.0001 |
|                           | UI vs. <i>Sp</i>         | noCSE           | <0.0001 |
|                           | <i>Msm</i> vs. <i>Sp</i> | noCSE           | <0.0001 |
|                           | UI vs. <i>Msm</i>        | + CSE           | <0.0001 |
|                           | UI vs. <i>Sp</i>         | + CSE           | <0.0001 |
|                           | <i>Msm</i> vs. <i>Sp</i> | + CSE           | <0.0001 |
|                           | UI                       | noCSE vs. + CSE | 1       |
|                           | <i>Msm</i>               | noCSE vs. + CSE | <0.0001 |
|                           | <i>Sp</i>                | noCSE vs. + CSE | 1       |
| <b>COPD</b>               |                          |                 |         |
|                           | UI vs. <i>Msm</i>        | noCSE           | <0.0001 |
|                           | UI vs. <i>Sp</i>         | noCSE           | <0.0001 |
|                           | <i>Msm</i> vs. <i>Sp</i> | noCSE           | <0.0001 |
|                           | UI vs. <i>Msm</i>        | + CSE           | <0.0001 |
|                           | UI vs. <i>Sp</i>         | + CSE           | <0.0001 |
|                           | <i>Msm</i> vs. <i>Sp</i> | + CSE           | <0.0001 |
|                           | UI                       | noCSE vs. + CSE | 0.9964  |
|                           | <i>Msm</i>               | noCSE vs. + CSE | <0.0001 |
|                           | <i>Sp</i>                | noCSE vs. + CSE | 0.004   |
| <b>Smoker</b>             |                          |                 |         |
|                           | UI vs. <i>Msm</i>        | noCSE           | <0.0001 |
|                           | UI vs. <i>Sp</i>         | noCSE           | <0.0001 |
|                           | <i>Msm</i> vs. <i>Sp</i> | noCSE           | <0.0001 |
|                           | UI vs. <i>Msm</i>        | + CSE           | <0.0001 |
|                           | UI vs. <i>Sp</i>         | + CSE           | <0.0001 |
|                           | <i>Msm</i> vs. <i>Sp</i> | + CSE           | <0.0001 |
|                           | UI                       | noCSE vs. + CSE | 0.0006  |
|                           | <i>Msm</i>               | noCSE vs. + CSE | <0.0001 |
|                           | <i>Sp</i>                | noCSE vs. + CSE | <0.0001 |
| <b>Healthy vs. COPD</b>   |                          |                 |         |
|                           | UI                       | noCSE           | 0.9964  |
|                           | <i>Msm</i>               | noCSE           | 1       |
|                           | <i>Sp</i>                | noCSE           | 0.999   |
|                           | UI                       | + CSE           | 1       |
|                           | <i>Msm</i>               | + CSE           | 1       |
|                           | <i>Sp</i>                | + CSE           | 1       |
| <b>Healthy vs. Smoker</b> |                          |                 |         |
|                           | UI                       | noCSE           | 1       |
|                           | <i>Msm</i>               | noCSE           | 1       |
|                           | <i>Sp</i>                | noCSE           | 1       |
|                           | UI                       | + CSE           | 1       |
|                           | <i>Msm</i>               | + CSE           | 1       |
|                           | <i>Sp</i>                | + CSE           | 1       |
| <b>COPD vs. Smoker</b>    |                          |                 |         |
|                           | UI                       | noCSE           | 1       |
|                           | <i>Msm</i>               | noCSE           | 1       |
|                           | <i>Sp</i>                | noCSE           | 1       |
|                           | UI                       | + CSE           | 0.9998  |
|                           | <i>Msm</i>               | + CSE           | 1       |
|                           | <i>Sp</i>                | + CSE           | 0.9995  |

**Acronyms:**

UI = Uninfected  
*Msm* = *M. smegmatis*  
*Sp* = *S. pneumoniae*  
CSE = cigarette smoke extract

bioRxiv preprint doi: <https://doi.org/10.1101/2022.02.20.482983>; this version posted March 2, 2022. The copyright holder for this preprint (which was not certified by peer review) is the author/funder. All rights reserved. No reuse allowed without permission.
